# Supplementary material
Source: PubMed Central journal article supplement (PMC3021080)
Supplement: 1010456108_pnas.1010456108_SI.pdf [file 1010456108_pnas.1010456108_SI.pdf]

# Supporting Information

Ha et al. 10.1073/pnas.1010456108

## SI Text

**SI Analysis. Improved ethanol yield of cofermentation when compared to single sugar fermentations (cellobiose or xylose).** First, the mass balances between substrate (xylose, cellobiose, and a mixture of xylose and cellobiose) and fermentation products (cell mass and ethanol) explain the improved yield of cofermentation. In both cases of xylose (Fig. 3A) and cellobiose (Fig. 3C) fermentations, about 4.8 g/L of cells (OD ~ 16) were produced after consuming 40 g/L of sugars. In other words, the yields of biomass ( $Y_{\text{Biomass/xylose}}$ ) from either xylose or cellobiose were about 0.12 g cell/g sugar. In cofermentation (Fig. 3B), the final cell density was only 6.2 g/L (OD ~ 22) even though twice amounts of sugars (total 80 g/L of sugars) were consumed. Therefore, the yield of biomass from the cofermentation was only 0.08 g/g sugars. These data explain how cofermentation results in higher ethanol yield than single sugar fermentation. Second, xylose fermentation by engineered *S. cerevisiae* requires oxygen-limited conditions for efficient ethanol production (1, 2). As shown in Fig. 3A, ethanol production from xylose begins only when the cell density is high enough to cause oxygen-limitation (after 12 h). However, in the case of cofermentation, yeast cells grew faster and oxygen-limitation started earlier than for single sugar fermentation conditions. As such, consumption of sugars during cofermentation can be less oxidative (or more fermentative) than single sugar fermentation, which resulted in more ethanol production. In addition, the slow release of glucose from intracellular hydrolysis of glucose may exert partial glucose repression, which brings about more fermentative sugar metabolism resulting improved ethanol production while xylose transport is not limited.

**Prediction of sugar concentrations in cellulosic hydrolyzates.** The composition of different lignocellulosic plants varies broadly. For instance, the US Department of Energy biomass database lists the composition of more than 150 biomass samples ([http://www1.eere.energy.gov/biomass/m/feedstock\\_databases.html](http://www1.eere.energy.gov/biomass/m/feedstock_databases.html)). The cellulose to hemicellulose ratios of these samples are between 1.4 and 19, and the average is 2.3. Energy crops typically have higher hemicellulose content than woody biomass. The average cellulose to hemicellulose ratios of sugarcane bagasse, corn stover, and sorghum are 2.0, 1.85, and 2.14, respectively. We therefore used a glucan/xylose ratio of 2 in our simulated sugar experiment design. The engineered yeast will likely be used in conjunction with traditional cellulase cocktails that are deficient

in  $\beta$ -glucosidase activities for the biofuels production. The biomass hydrolysis process may result in small amounts of glucose in the lignocellulosic hydrolysates as 6–30% glucan-to-glucose conversions with incomplete cellulase cocktails were reported (3). Considering all the above factors, a sugar combination of 80 g/L cellobiose, 10 g/L glucose, and 40 g/L xylose was chosen in the simulated sugar experiments.

**SI Discussion. Advantages of intracellular hydrolysis of cellobiose over extracellular hydrolysis.** Our approach holds several advantages over the cell surface display strategy employed by Nakamura et al. (4). First, intracellular hydrolysis of cellobiose via the cellobiose transport system (5) can reduce the glucose transport load of hexose/pentose sugar transporters. The transport of the extracellular glucose, generated from extracellular hydrolysis by a displayed enzyme on cell surface, may compete with xylose for cross-membrane transportation because glucose inhibits xylose transport competitively (2, 3, 5). In addition, the system presented in here exploits the higher affinity that cellobiose transporter have for cellobiose ( $K_M \approx 3\text{--}4 \mu\text{M}$ ) as compared to  $\beta$ -glucosidases [ $K_M \approx 100\text{--}1,000 \mu\text{M}$  (5)] and the *S. cerevisiae* hexose transporters' apparent affinity for glucose [ $K_M \approx 1,000\text{--}10,000 \mu\text{M}$  (5)]. The surface display of a  $\beta$ -glucosidase relies on the extracellular hydrolysis of cellobiose to glucose by a low-affinity beta-glucosidase followed by transport via low-affinity hexose transporters, and will be compromised at both steps. These inefficiencies will become particularly important during simultaneous saccharification and fermentation, when soluble sugars much be kept at a concentration that does not inhibit cellulases [19–410  $\mu\text{M}$  (5)]. Second, expression levels of  $\beta$ -glucosidase on the cell surface needs careful optimization under given conditions in order to prevent excessive hydrolysis of cellobiose, as noted by Nakamura et al. (4). Excessive hydrolysis of cellobiose would result in glucose accumulation at high concentrations, which would impede cofermentation of xylose. In this sense, the cellobiose transport system is more amenable for constructing cofermenting strain under various conditions. Third, the stability of intracellular  $\beta$ -glucosidase will be higher than a displayed  $\beta$ -glucosidase because the intracellular enzyme can be protected from harsh external environments. Intracellular expression could provide a significant benefit in fermentation of lignocellulosic hydrolyzates, which contain uncharacterized toxic or poisoning compounds to enzymes.

1. Jin YS, Laplaza JM, Jeffries TW (2004) *Saccharomyces cerevisiae* engineered for xylose metabolism exhibits a respiratory response. *Appl Environ Microbiol* 70:6816–6825.
2. Souto-Maior AM, Runquist D, Hahn-Hägerdal B (2009) Crabtree-negative characteristics of recombinant xylose-utilizing *Saccharomyces cerevisiae*. *J Biotechnol* 143:119–123.
3. Medve J, Karlsson J, Lee D, Tjerneld F (1998) Hydrolysis of microcrystalline cellulose by cellobiohydrolase I and endoglucanase II from *Trichoderma reesei*: adsorption, sugar production pattern, and synergism of the enzymes. *Biotechnol Bioeng* 59:621–634.
4. Nakamura N, et al. (2008) Effective xylose/cellobiose cofermentation and ethanol production by xylose-assimilating *S. cerevisiae* via expression of beta-glucosidase on its cell surface. *Enz Microb Technol*. 43:233–236.
5. Galazka JM, et al. (2010) Cellobiose transport in yeast for improved biofuel production. *Science* 330:84–86.











**Table S1. Comparison of fermentation parameters by DA24 and DA24-16 under two different sugar conditions**

| Carbon source                        | Strains | Produced ethanol (g/L) | Sugar consumption rate (g/L-h) | Yield (g/g) | Productivity (g/L-h) |
|--------------------------------------|---------|------------------------|--------------------------------|-------------|----------------------|
| Xylose (80 g/L)                      | DA24    | 24.2                   | 1.16                           | 0.34        | 0.40                 |
|                                      | DA24-16 | 27.9                   | 1.32                           | 0.35        | 0.47                 |
| Glucose (70 g/L) and xylose (40 g/L) | DA24    | 34.8                   | 1.45                           | 0.39        | 0.74                 |
|                                      | DA24-16 | 45.1                   | 1.78                           | 0.42        | 0.96                 |

**Table S2. Comparison of fermentation parameters of DA24 and DA24-16 with other engineered *S. cerevisiae* strains**

| Strain                              | Relevant genotype/phenotype                                                                         | Specific xylose consumption rate (g xylose/g cell · h) | Ethanol yield (g/g) | Xylitol yield (g/g) | Reference  |
|-------------------------------------|-----------------------------------------------------------------------------------------------------|--------------------------------------------------------|---------------------|---------------------|------------|
| DA24                                | <i>XYL1</i> , a mutant <i>XYL1</i> , <i>XYL2</i> , and <i>XKS1</i>                                  | 0.53                                                   | 0.32                | 0.08                | This study |
| DA24-16                             | Evolved isolate from DA24                                                                           | 0.71                                                   | 0.35                | 0.04                | This study |
| H1693                               | <i>XYL1</i> and <i>XYL2</i>                                                                         | 0.09                                                   | 0.04                | 0.47                | (10)       |
| H1691                               | <i>XYL1</i> , <i>XYL2</i> , and <i>XKS1</i>                                                         | 0.2                                                    | 0.12                | 0.41                | (10)       |
| TMB3399                             | <i>XYL1</i> , <i>XYL2</i> , and <i>XKS1</i>                                                         | NA                                                     | 0.05                | 0.59                | (11)       |
| TMB3400                             | Chemical mutant of TMB3399                                                                          | NA                                                     | 0.18                | 0.25                | (11)       |
| C1                                  | Evolved isolate from TMB3001                                                                        | 0.56                                                   | 0.24                | 0.32                | (12)       |
| H2674 (control)                     | <i>XYL1</i> , <i>XYL2</i> , and <i>XKS1</i>                                                         | 0.07                                                   | 0.14                | 0.56                | (13)       |
| H2673 (GPD1)                        | <i>XYL1</i> , <i>XYL2</i> , <i>XKS1</i> , and <i>GPD1</i> overexpression                            | 0.06                                                   | 0.17                | 0.49                | (13)       |
| H2723 ( $\Delta zwf1$ )             | <i>XYL1</i> , <i>XYL2</i> , <i>XKS1</i> , and $\Delta zwf1$                                         | 0.05                                                   | 0.18                | 0.29                | (13)       |
| H2684 ( <i>GPD1</i> $\Delta zwf1$ ) | <i>XYL1</i> , <i>XYL2</i> , <i>XKS1</i> , <i>GPD1</i> overexpression, and $\Delta zwf1$             | 0.06                                                   | 0.31                | 0.35                | (13)       |
| RWB202-AFX                          | <i>XI</i> , evolved isolate                                                                         | 0.21                                                   | 0.42                | 0.02                | (14)       |
| RWB217                              | <i>XI</i> , <i>XK</i> , $\Delta GRE3$ , and overexpressed pentose phosphate pathway (PPP) enzymes   | NA                                                     | 0.43                | 0.003               | (15)       |
| RWB218                              | <i>XI</i> , <i>XK</i> , $\Delta GRE3$ , overexpressed PPP, and selected for enhanced glucose uptake | NA                                                     | 0.41                | 0.001               | (16)       |
| H2490-4                             | <i>XYL1</i> , <i>XYL2</i> , <i>XKS1</i> , and adaptation                                            | 0.58                                                   | 0.14                | 0.82                | (17)       |
| TMB3001                             | <i>XYL1</i> , <i>XYL2</i> , and <i>XKS1</i>                                                         | 0.15                                                   | 0.31                | 0.29                | (18)       |
| TMB3255                             | <i>XYL1</i> , <i>XYL2</i> , <i>XKS1</i> , and $\Delta zwf1$                                         | 0.02                                                   | 0.41                | 0.05                | (18)       |
| TMB3008                             | <i>XYL1</i> , <i>XYL2</i> , <i>XKS1</i> , and $\Delta gnd1$                                         | 0.08                                                   | 0.38                | 0.13                | (18)       |
| TMB3250                             | <i>XYL1</i> , <i>XYL2</i> , <i>XKS1</i>                                                             | 0.1                                                    | 0.3                 | 0.3                 | (18)       |
| TMB3251                             | <i>XYL1</i> , <i>XYL2</i> , <i>XKS1</i> , and attenuated PGI                                        | 0.07                                                   | 0.34                | 0.21                | (18)       |
| TMB3256                             | <i>XYL1</i> , <i>XYL2</i> , <i>XKS1</i> , and <i>ZWF1</i>                                           | 0.06                                                   | 0.36                | 0.13                | (19)       |
| TMB3037                             | <i>XYL1</i> , <i>XYL2</i> , <i>XKS1</i> , and YRP13- <i>ZWF1</i>                                    | 0.11                                                   | 0.34                | 0.19                | (19)       |
| TMB3260                             | <i>XYL1</i> , <i>XYL2</i> , <i>XKS1</i> , and high XR activity                                      | 0.25                                                   | 0.3                 | 0.13                | (20)       |
| TMB3253 control                     | <i>XYL1</i> , <i>XYL2</i> , <i>XKS1</i> , strain for TMB3254                                        | 0.16                                                   | 0.28                | 0.34                | (19)       |
| TMB3254                             | <i>XYL1</i> , <i>XYL2</i> , <i>XKS1</i> , overproducing transhydrogenase                            | 0.16                                                   | 0.28                | 0.3                 | (19)       |

Toivari MH, Aristidou A, Ruohonen L, Penttilä M (2001) Conversion of xylose to ethanol by recombinant *Saccharomyces cerevisiae*: Importance of xylulokinase (*XKS1*) and oxygen availability. *Metab Eng* 3:236–249.

Wahlbom CF, Van Zyl WH, Jönsson LJ, Hahn-Hägerdal B, Cordero Otero RR (2003) Generation of the improved recombinant xylose-utilizing *Saccharomyces cerevisiae* TMB 3400 by random mutagenesis and physiological comparison with *Pichia stipitis* CBS 6054. *FEMS Yeast Res* 3:319–326.

Sonderegger M, Sauer U (2003) Evolutionary engineering of *Saccharomyces cerevisiae* for anaerobic growth on xylose. *Appl Environ Microbiol* 69:1990–1998.

Verho R, Londesborough J, Penttilä M, Richard P (2003) Engineering redox cofactor regeneration for improved pentose fermentation in *Saccharomyces cerevisiae*. *Appl Environ Microbiol* 69:5892–5897.

Kuyper M, Winkler AA, Van Dijken JP, Pronk JT (2004) Minimal metabolic engineering of *Saccharomyces cerevisiae* for efficient anaerobic xylose fermentation: A proof of principle. *FEMS Yeast Res* 4:655–664.

Kuyper M, et al. (2005) Metabolic engineering of a xylose-isomerase-expressing *Saccharomyces cerevisiae* strain for rapid anaerobic xylose fermentation. *FEMS Yeast Res* 5:399–409.

Kuyper M, et al. (2005) Evolutionary engineering of mixed-sugar utilization by a xylose-fermenting *Saccharomyces cerevisiae* strain. *FEMS Yeast Res* 5:925–934.

Pitkänen J-P, Rintala E, Aristidou A, Ruohonen L, Penttilä M (2005) Xylose chemostat isolates of *Saccharomyces cerevisiae* show altered metabolite and enzyme levels compared with xylose, glucose, and ethanol metabolism of the original strain. *Appl Microbiol Biotechnol* 67:827–837.

Jeppsson M, Johansson B, Hahn-Hägerdal B, Gorwa-Grauslund MF (2002) Reduced oxidative pentose phosphate pathway flux in recombinant xylose-utilizing *Saccharomyces cerevisiae* strains improves the ethanol yield from xylose. *Appl Environ Microbiol* 68:1604–1609.

Jeppsson M, Johansson B, Jensen PR, Hahn-Hägerdal B, Gorwa-Grauslund MF (2003) The level of glucose-6-phosphate dehydrogenase activity strongly influences xylose fermentation and inhibitor sensitivity in recombinant *Saccharomyces cerevisiae* strains. *Yeast* 20:1263–1272.

Jeppsson M, Träff K, Johansson B, Hahn-Hägerdal B, Gorwa-Grauslund MF (2003) Effect of enhanced xylose reductase activity on xylose consumption and product distribution in xylose-fermenting recombinant *Saccharomyces cerevisiae*. *FEMS Yeast Res* 3:167–175.

**Table S3. Cofermentation of cellobiose and xylose using mixtures containing various concentrations of cellobiose and xylose by DA24-16BT3 strain**

| Cellobiose/xylose (g/L) | Produced ethanol (g/L) | Sugar consumption rate (g/L-h) | Yield (g/g) | Productivity (g/L-h) |
|-------------------------|------------------------|--------------------------------|-------------|----------------------|
| 20/20                   | 14.8                   | 1.12                           | 0.37        | 0.41                 |
| 30/30                   | 23.3                   | 1.33                           | 0.37        | 0.50                 |
| 40/40                   | 30.5                   | 1.67                           | 0.39        | 0.65                 |



**Table S4. Cofermentation of glucose, cellobiose, and xylose (10 g/L, 80 g/L, and 40 g/L, respectively) using bioreactor by DA24-16BT3 strain using different inoculums**

| Target initial OD ( $A_{600}$ ) | Produced ethanol (g/L) | Sugar consumption rate (g/L-h) | Ethanol yield (g/g) | Productivity (g/L-h) |
|---------------------------------|------------------------|--------------------------------|---------------------|----------------------|
| ~1 (1.2)                        | 47.9                   | 1.93                           | 0.37                | 0.71                 |
| ~10 (10.2)                      | 48.1                   | 2.18                           | 0.37                | 0.82                 |

**Table S5. Strains and plasmids used in this study**

| Strain or plasmid            | Description                                                                                                                                                                                                                                                                          | Reference               |
|------------------------------|--------------------------------------------------------------------------------------------------------------------------------------------------------------------------------------------------------------------------------------------------------------------------------------|-------------------------|
| <b>Strains</b>               |                                                                                                                                                                                                                                                                                      |                         |
| D452-2                       | <i>MATa, leu2, his3, ura3, can1</i>                                                                                                                                                                                                                                                  | Hosaka et al. (6)       |
| D801-130                     | D452-2 expressing $\beta$ -glucosidase ( <i>gh1-1</i> ) and <i>cdt-1</i> (NCU00801)                                                                                                                                                                                                  | In this study           |
| D809-130                     | D452-2 expressing $\beta$ -glucosidase ( <i>gh1-1</i> ) and NCU00809                                                                                                                                                                                                                 | In this study           |
| D8114-130                    | D452-2 expressing $\beta$ -glucosidase ( <i>gh1-1</i> ) and <i>cdt-2</i> (NCU08114)                                                                                                                                                                                                  | In this study           |
| DA24                         | D452-2 expressing <i>XYL1, mXYL1, XYL2, and XKS1</i> (Isogenic of D452-2 except for <i>leu2 :: TDH3<sub>p</sub>-XYL1-TDH3<sub>T</sub>, ura3 :: URA3-PGK<sub>p</sub>-mXYL1-PGK<sub>T</sub>-PGK<sub>p</sub>-XYL2-PGK<sub>T</sub>, Ty3 :: neo-TDH<sub>p</sub>-XKS1-TDH<sub>T</sub>)</i> | In this study           |
| DA24-16                      | Evolved strain of DA24 in xylose containing media                                                                                                                                                                                                                                    | In this study           |
| DA24-16BT3                   | DA24-16 expressing $\beta$ -glucosidase ( <i>gh1-1</i> ) in a multicopy plasmid and <i>cdt-1</i> (NCU00801) through single-copy integration                                                                                                                                          | In this study           |
| DA24-16BT-M                  | DA24-16 expressing $\beta$ -glucosidase ( <i>gh1-1</i> ) and <i>cdt-1</i> (NCU00801) in multicopy plasmids                                                                                                                                                                           | In this study           |
| <i>P. stipitis</i> CBS 6054  | NRRL Y-11545 = ATCC58785 = IFO10063                                                                                                                                                                                                                                                  | Jeffries et al. (7)     |
| <b>Plasmids</b>              |                                                                                                                                                                                                                                                                                      |                         |
| pRS425                       | <i>LEU2</i> , a multicopy plasmid                                                                                                                                                                                                                                                    | Christianson et al. (8) |
| pRS426                       | <i>URA3</i> , a multicopy plasmid                                                                                                                                                                                                                                                    | Christianson et al. (8) |
| pRS403                       | <i>HIS3</i> , an integrative plasmid                                                                                                                                                                                                                                                 | Sikorski et al. (9)     |
| pRS405                       | <i>URA3</i> , an integrative plasmid                                                                                                                                                                                                                                                 | Sikorski et al. (9)     |
| pRS425- $\beta$ -glucosidase | $\beta$ -glucosidase ( <i>gh1-1</i> ) under the control of PGK promoter in pRS425                                                                                                                                                                                                    | Galazka et al. (5)      |
| pRS426- <i>cdt-1</i>         | <i>cdt-1</i> under the control of PGK promoter in pRS426                                                                                                                                                                                                                             | Galazka et al. (5)      |
| pRS426- <i>cdt-2</i>         | <i>cdt-2</i> under the control of PGK promoter in pRS426                                                                                                                                                                                                                             | Galazka et al. (5)      |
| pRS426-NCU00809              | NCU00809 under the control of PGK promoter in pRS426                                                                                                                                                                                                                                 | Galazka et al. (5)      |
| pRS403- <i>cdt-1</i>         | <i>cdt-1</i> under the control of PGK promoter in pRS403                                                                                                                                                                                                                             | In this study           |

Hosaka K, Nikawa J, Kodaki T, Yamashita S (1992) A dominant mutation that alters the regulation of *INO1* expression in *Saccharomyces cerevisiae*. *J Biochem* 111:352–358.

Jeffries TW, et al. (2007) Genome sequence of the lignocellulose-bioconverting and xylose-fermenting yeast *Pichia stipitis*. *Nat Biotechnol* 25:319–326.

Christianson TW, Sikorski RS, Dante M, Shero JH, Hieter P (1992) Multifunctional yeast high-copy-number shuttle vectors. *Gene* 110:119–122.

Sikorski RS, Hieter P (1989) A system of shuttle vectors and yeast host strains designed for efficient manipulation of DNA in *Saccharomyces cerevisiae*. *Genetics* 122:19–27.

**Table S6. Synthetic oligonucleotides used in this study**

| Name       | Sequences                                                     |
|------------|---------------------------------------------------------------|
| NCU00801-F | ATGGATCCAAAATGTCGTCTCACGGCTCC                                 |
| NCU00801-R | ATGAATTCCTACAAATCTTCTCAGAAATCAATTTTGTTCAGCAACGATAGCTTCGGAC    |
| NCU08114-F | ATACTAGTAAAAATGGGCATCTTCAACAAGAAGC                            |
| NCU08114-R | GCATATCGATCTACAAATCTTCTCAGAAATCAATTTTGTTCAGCAACAGACTTGCCTCATG |
| NCU00130-F | GCATACTAGTAAAAATGTCTCTTCTAAGGATTTCTCT                         |
| NCU00130-R | ATACTGCAGTTAATGATGATGATGATGATGGTCTTCTTGATCAAAGAGTCA AAG       |
